# Supplementary material
Source: publisher figshare collection journal article supplement (https://acs.figshare.com/ndownloader/files/27486354)
Supplement: Supplementary file 1 [file 27486354]

## *Supporting Information*

### **A Rapid $^1\text{H}$ NMR Based Estimation of PONA for Light and Narrow Cut Naphtha Samples of Refinery Streams towards BS-VI Gasoline**

Sujit Mondal\*, Kalicharan Chattopadhyay, Ravindra Kumar, J. Christopher & Gurpreet S. Kapur

Indian Oil Corporation Limited, R&D Division, Sector-13, Faridabad-121007, India

\*Corresponding author: [mondals3@indianoil.in](mailto:mondals3@indianoil.in)

|                                                                        |       |
|------------------------------------------------------------------------|-------|
| 1. Brief Description of Estimation of Olefin by $^1\text{H}$ NMR ----- | S1    |
| 2. Correlation Diagrams -----                                          | S1-S6 |

### 1.0 Estimation of Olefin by $^1\text{H}$ NMR

As described in our recent publication [*Energy Fuels*, **33(2)** (2019), pp. 1114–1122] two required parameters for olefin estimation- (i) average absolute number of unsaturated hydrogen ( $H$ ) per average olefinic moiety and (ii) average alkyl chain length ( $n$ ) of the olefins. The  $H$  is estimated by estimating mol fractions of different types of olefinic signals ( $=\text{CH}$ ,  $=\text{CH}_2$ ) in the olefinic region (4.4–6.6 ppm) of the  $^1\text{H}$  NMR spectrum  $n$  is estimated by SIMDist (or,  $^{13}\text{C}$  NMR). The total protons in an average olefins would then be  $2n$  leading to %age of olefinic protons (%UH) as  $H/2n$ . The olefin multiplication factor ( $f_o$ ) was then obtained ( $100/\text{UH}\%$ ) by which the %age of olefin is estimated using a normalized  $^1\text{H}$  NMR spectrum.

### 2.0 Correlation Curves of Various Regression Analyses

For Aromatics:

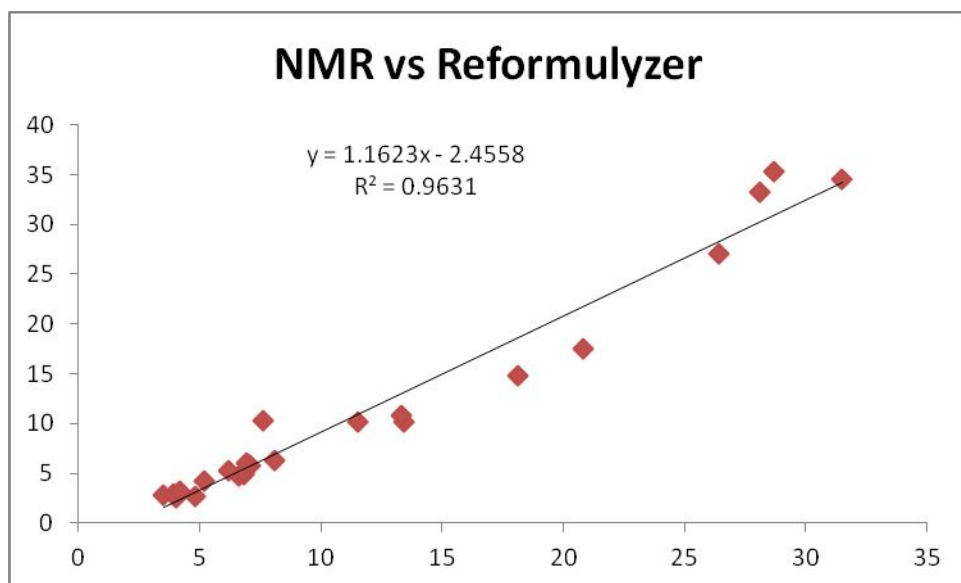

**Figure 1S.** Correlation Diagram for the Estimation of Aromatics by NMR vs. Refromulizer (ASTM D6839)

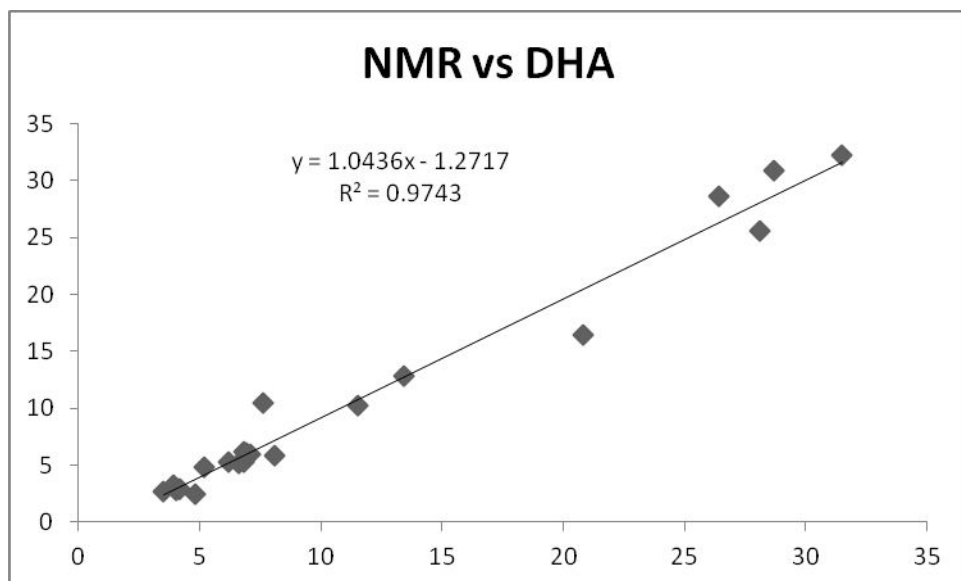

**Figure 2S.** Correlation Diagram for the Estimation of Aromatics by NMR vs. DHA [ASTM D6730-01(2016)].

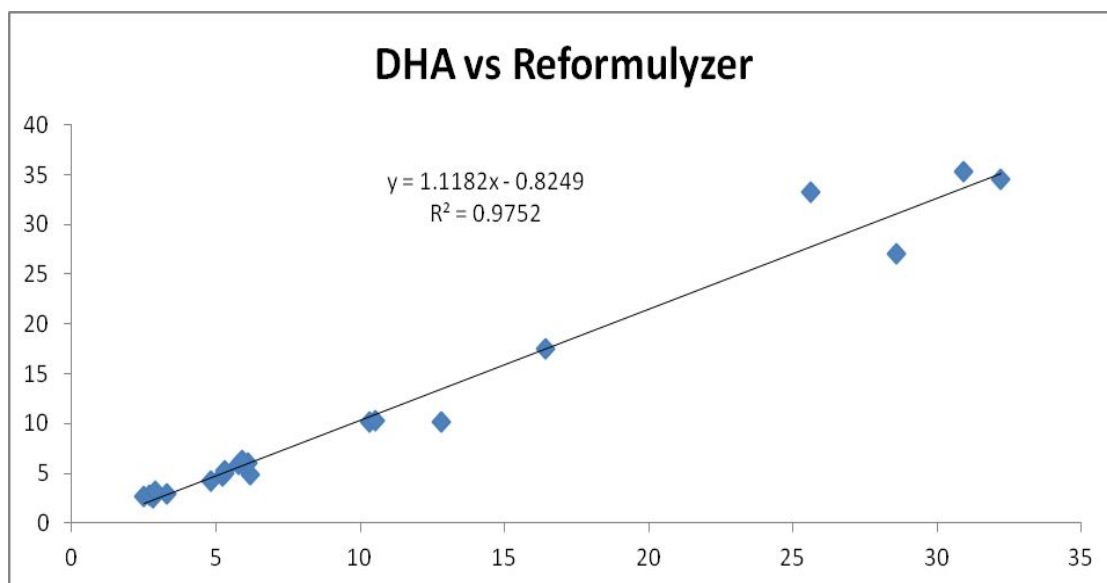

**Figure 3S.** Correlation Diagram for the Estimation of Aromatics by Refromulizer vs. DHA

For Olefins:

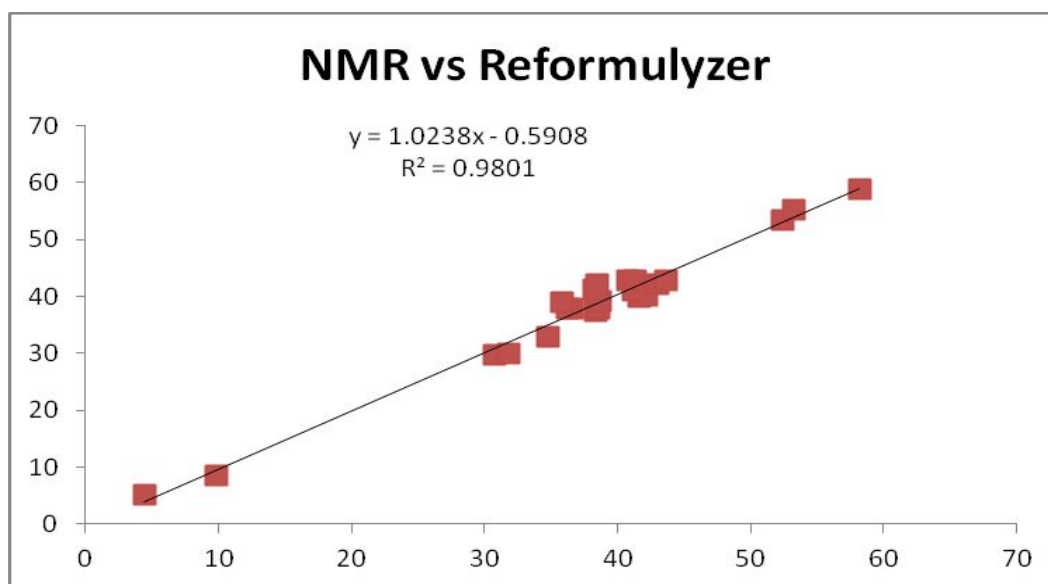

**Figure 4S.** Correlation Diagram for the Estimation of Olefins by NMR vs. Refromulizer (ASTM D6839)

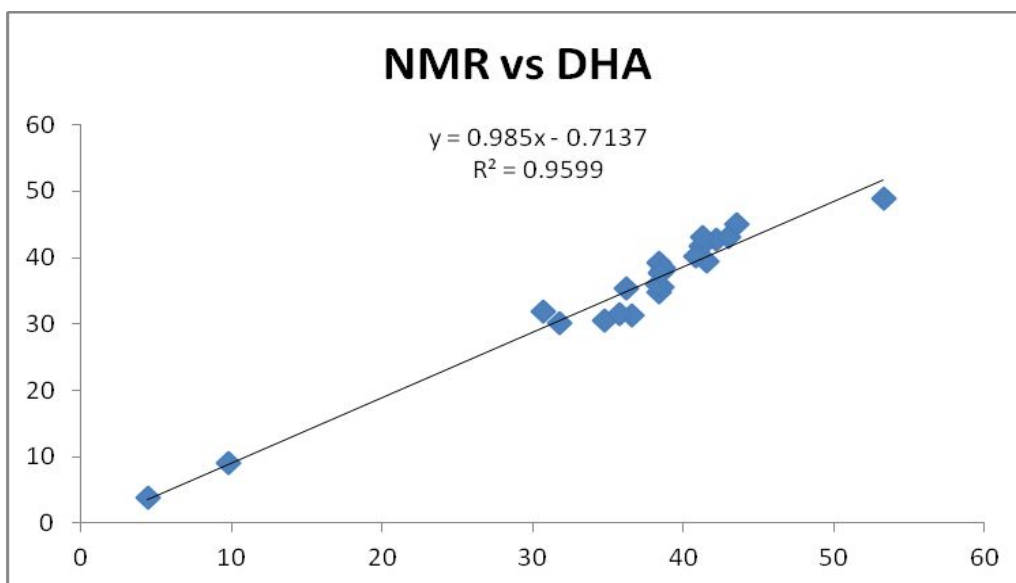

**Figure 5S.** Correlation Diagram for the Estimation of Olefins by NMR vs. DHA [ASTM D6730-01(2016)].

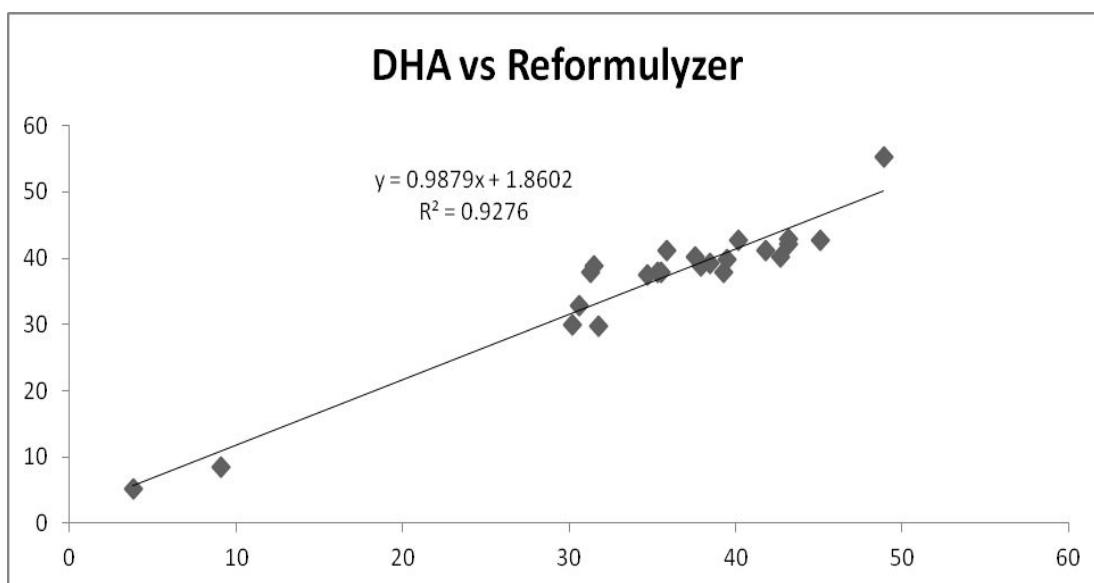

**Figure 6S.** Correlation Diagram for the Estimation of Olefins by Refromulizer vs. DHA.

For Naphthenes:

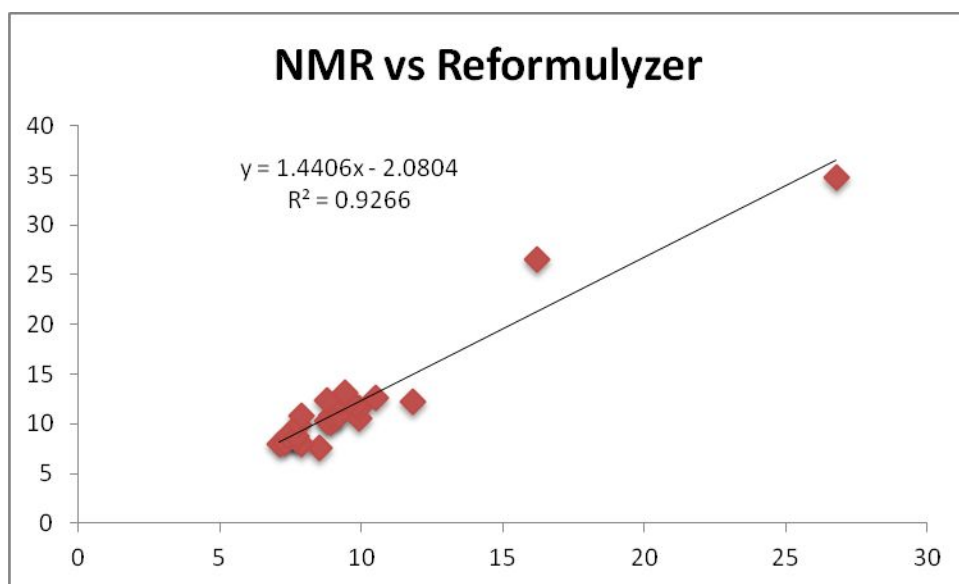

**Figure 7S.** Correlation Diagram for the Estimation of Naphthenes by NMR vs. Refromulizer (ASTM D6839)

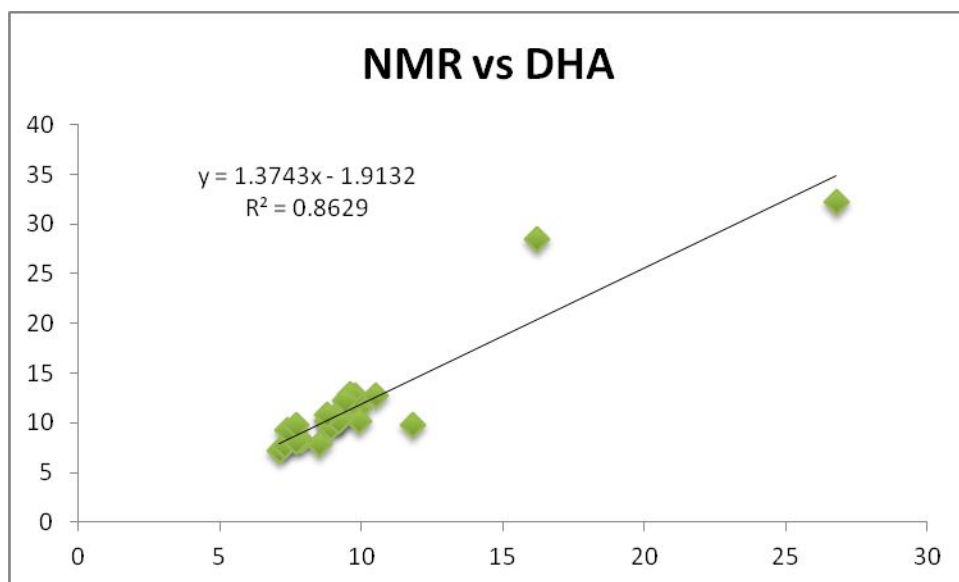

**Figure 8S.** Correlation Diagram for the Estimation of Naphthenes by NMR vs. DHA [ASTM D6730-01(2016)].

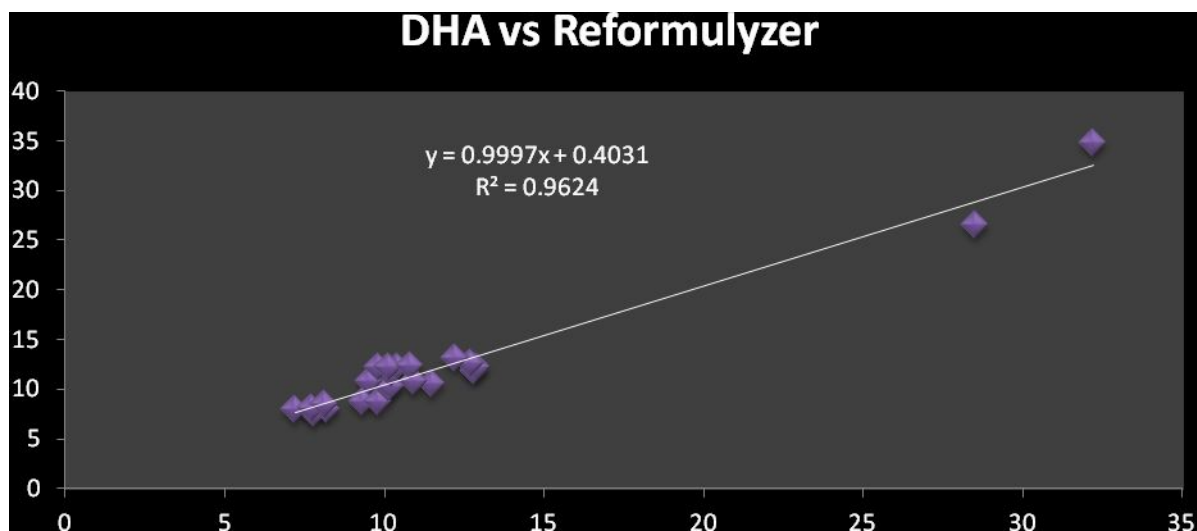

**Figure 9S.** Correlation Diagram for the Estimation of Naphthenes by Refromulizer vs. DHA.
